# Supplementary material for: Quantitative Proteomics of Maternal Blood Plasma in Isolated Intrauterine Growth Restriction
Source: MDPI journal article supplement (doi:10.3390/ijms242316832), 2023-11-27
Supplement: s1 [file s1]

## Supplementary S2

# Quantitative Proteomics of Maternal Blood Plasma in Isolated Intrauterine Growth Restriction

Natalia L. Starodubtseva<sup>1,2\*</sup>, Alisa O. Tokareva<sup>1</sup>, Maria V. Volochaeva<sup>1</sup>, Alexey S. Kononikhin<sup>1</sup>, Alexander G. Brzhozovskiy<sup>1</sup>, Anna E. Bugrova<sup>1,3</sup>, Angelika V. Timofeeva<sup>1</sup>, Evgenii N. Kukaev<sup>1,4</sup>, Victor L. Tyutyunnik<sup>1</sup>, Natalia E. Kan<sup>1</sup>, Vladimir E. Frankevich<sup>1,5</sup>, Evgeny N. Nikolaev<sup>4\*</sup> and Gennady T. Sukhikh<sup>1</sup>

1 National Medical Research Center for Obstetrics Gynecology and Perinatology Named after Academician V.I. Kulakov of the Ministry of Healthcare of Russian Federation, 117997 Moscow, Russia;

2 Moscow Institute of Physics and Technology, 141700 Moscow, Russia

3 Emanuel Institute of Biochemical Physics, Russian Academy of Sciences, 119334 Moscow, Russia;

4 V.L. Talrose Institute for Energy Problems of Chemical Physics, N.N. Semenov Federal Research Center for Chemical Physics, Russian Academy of Sciences, 119334 Moscow, Russia;

5 Laboratory of Translational Medicine, Siberian State Medical University, 634050 Tomsk, Russia

\* Correspondence: n\_starodubtseva@oparina4.ru (N.L.S.); ennikolaev@gmail.com (E.N.N.)

## TABLE OF CONTENT

|                                                                                                                                                                                                |    |
|------------------------------------------------------------------------------------------------------------------------------------------------------------------------------------------------|----|
| Figure 1S. BAK 125 kit plasma proteins concentration in the samples of pregnant women....                                                                                                      | 3  |
| Figure 2S. Changes in the blood plasma proteome during pregnancy.....                                                                                                                          | 3  |
| Figure 3S. Features of maternal plasma proteome change in IUGR (red) compared to control (green) group.....                                                                                    | 4  |
| Figure 4S. Maternal plasma proteome change in late IUGR (red) compared to low birth weight fetuses (green).....                                                                                | 4  |
| Figure 5S. Corplot of maternal plasma proteins correlated significantly with the fetoplacental blood flow parameters.....                                                                      | 5  |
| Figure 6S. Corplot of maternal plasma proteins correlated significantly with the condition of the newborn.....                                                                                 | 6  |
| Figure 7S. Boxplot of maternal plasma proteins, potential markers of newborn bleeding .....                                                                                                    | 7  |
| Figure 8S. ROC-curve and box-plot of maternal plasma Alpha-2-macroglobulin, a variable of the logistic regression model for early IUGR diagnosis.....                                          | 7  |
| Figure 9S. ROC-curve and box-plot of maternal plasma Alpha-2-macroglobulin and Apolipoprotein A-IV, variables of the logistic regression model for late IUGR diagnosis.....                    | 8  |
| Figure 10S. ROC-curve and box-plot of maternal plasma Antithrombin-III and Apolipoprotein C-I, variables of the logistic regression model for differentiation between late IUGR and SGA.....   | 8  |
| Figure 11S. ROC-curve and box-plot of maternal plasma Kallistatin and Metalloproteinase inhibitor 2, variables of the logistic regression model for fetal asphyxia prognosis.....              | 9  |
| Figure 12S. Fibrinosis system restriction in early IUGR.....                                                                                                                                   | 9  |
| Figure 13S. The example of total ion current (TIC) chromatogram for NAT and SIS peptides, corresponding to 18 plasma proteins .....                                                            | 10 |
| Figure 14S. The example of extracted ion chromatogram of MRM transitions monitored for proteotypic NAT and SIS peptides, corresponding to 18 plasma proteins - potential markers for IUGR..... | 11 |
| Table 1S. Newborns' clinical data.....                                                                                                                                                         | 12 |
| Table 2S. Molecular pathways, disturbed by IUGR. GO analysis of maternal plasma proteins, differentially expressed in IUGR.....                                                                | 13 |
| Table 3S. Transition list and parameters used to acquire all serum samples in this study.....                                                                                                  | 16 |



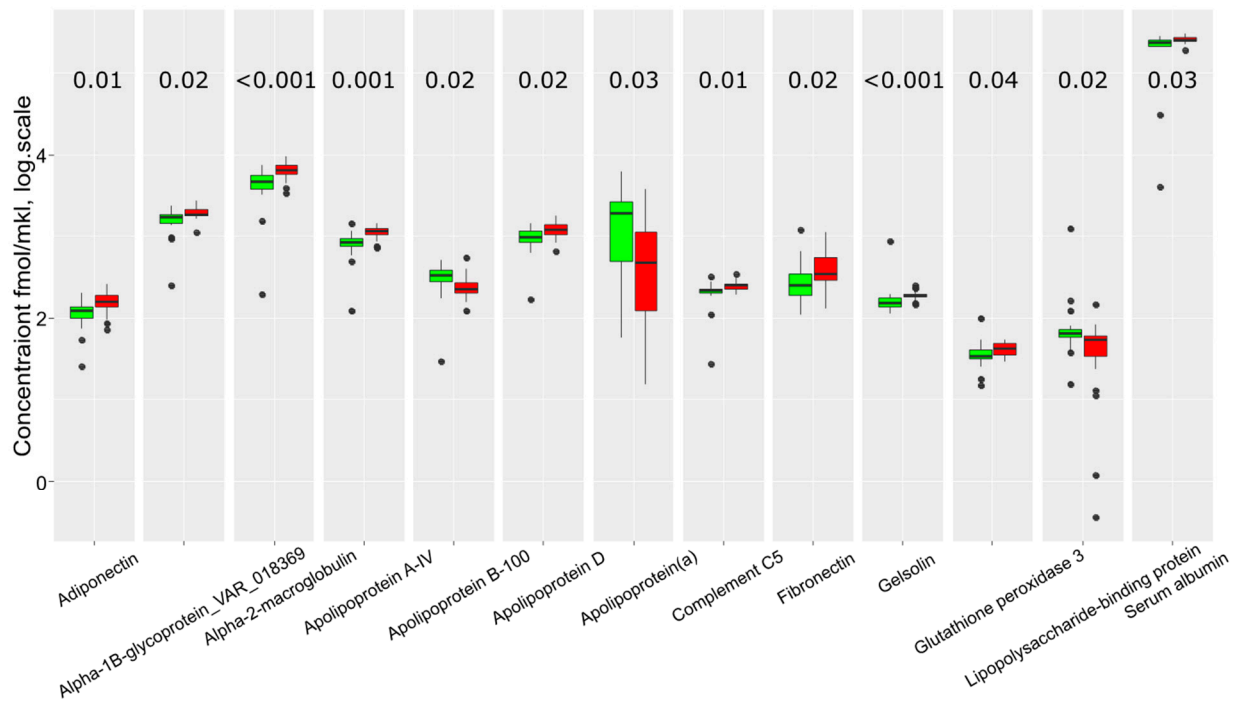

Figure S3. Features of maternal plasma proteome change in IUGR (red) compared to control (green) group.

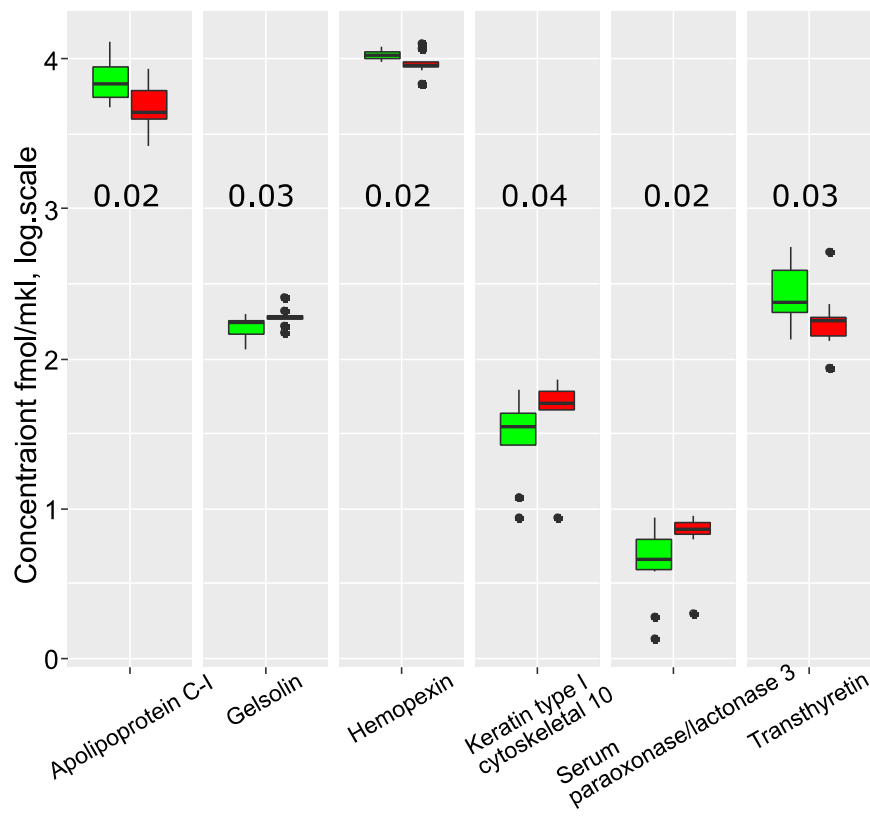

Figure S4. Maternal plasma proteome change in late IUGR (red) compared to low birth weight fetuses (green).

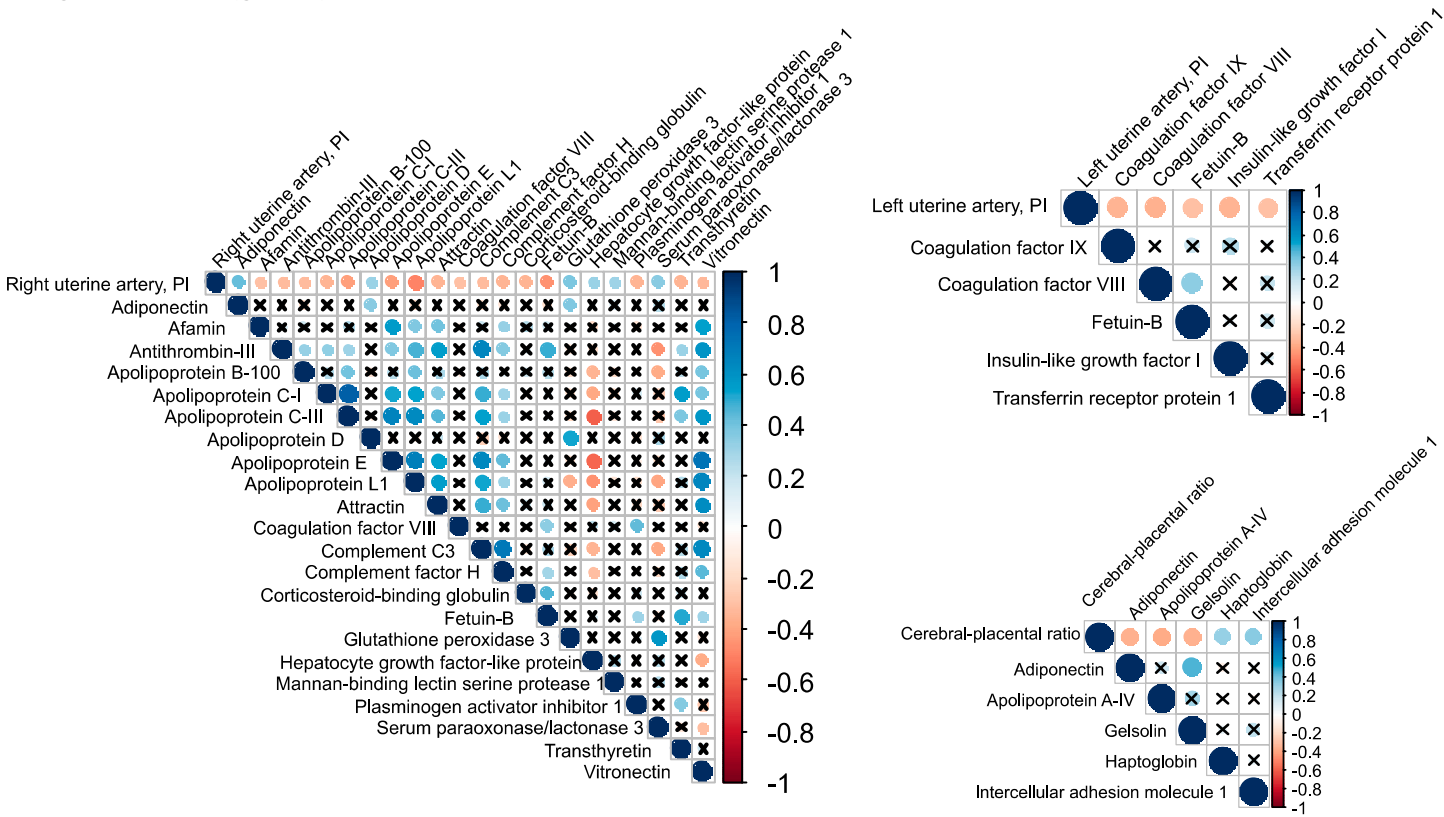

Figure S5. Corrplot of maternal plasma proteins correlated significantly ( $p < 0.05$ ) with the fetoplacental blood flow parameters.

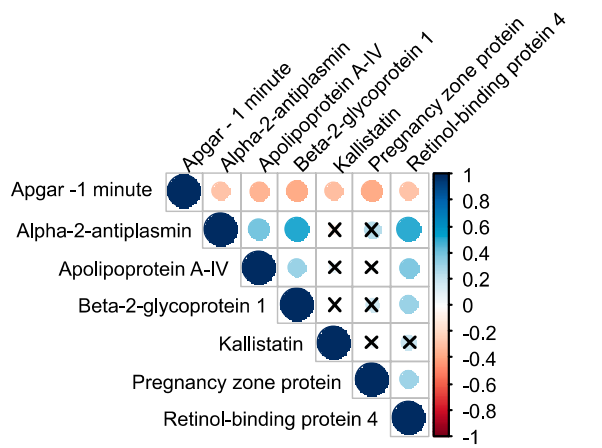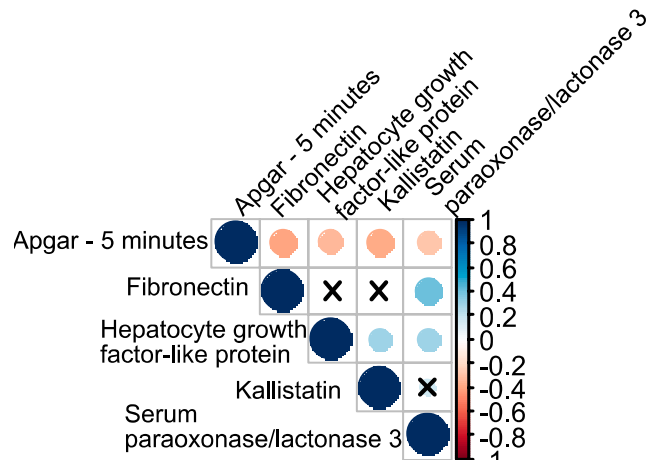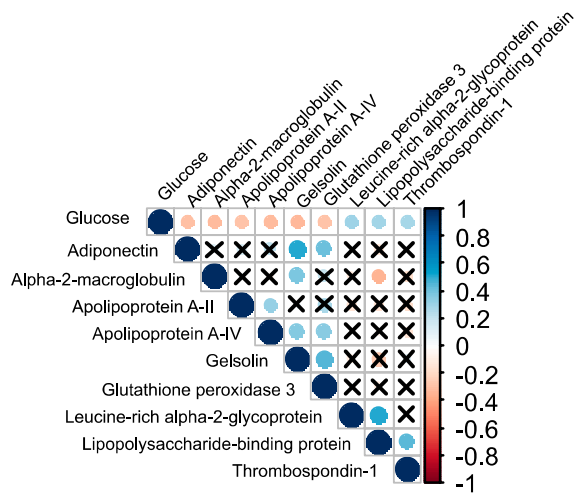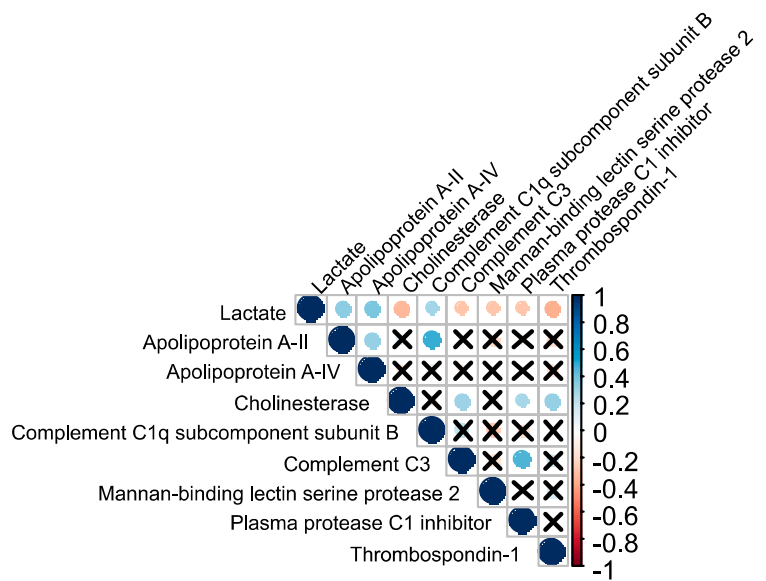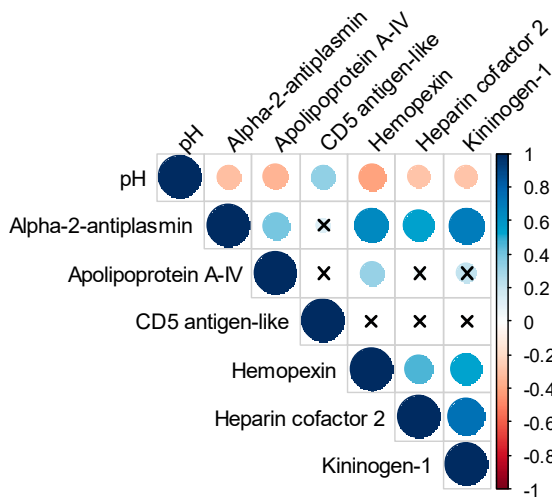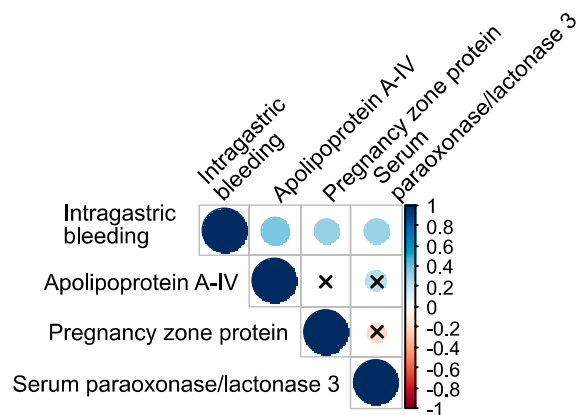

Figure S6. Corrplot of maternal plasma proteins correlated significantly ( $p < 0.05$ ) with the condition of the newborn.

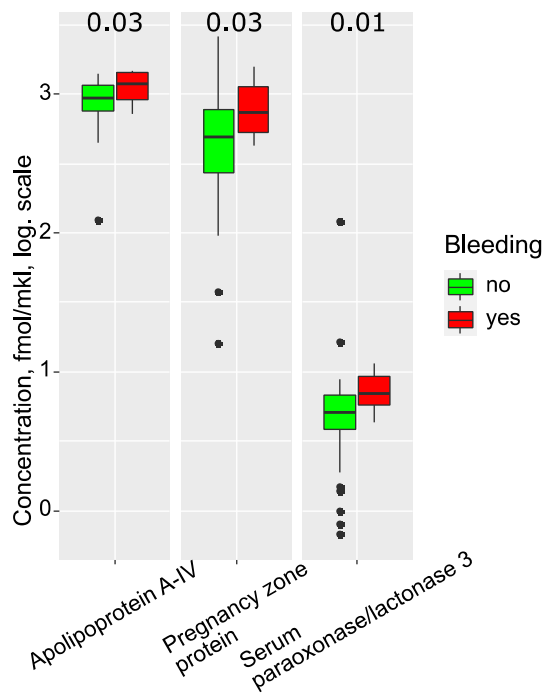

Figure S7. Box plot of maternal plasma proteins, potential markers of newborn bleeding ( $p < 0.05$ ).

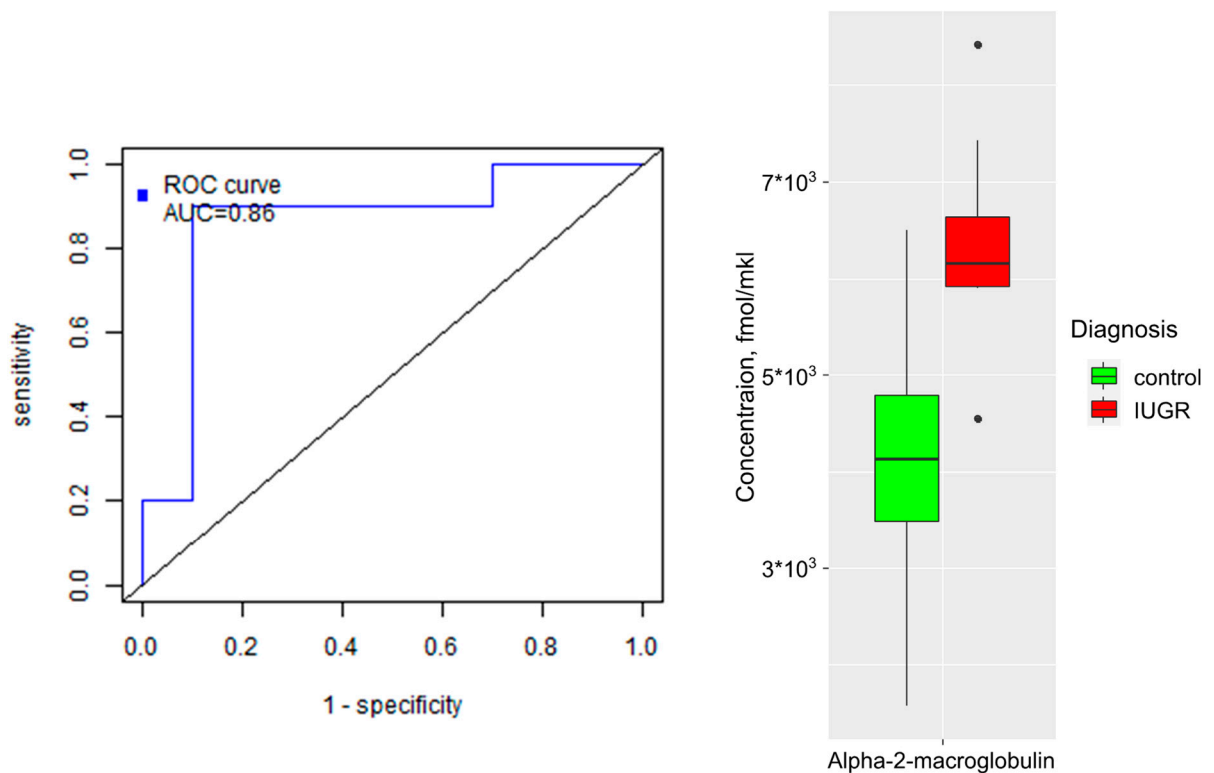

Figure S8. ROC-curve and box-plot of maternal plasma Alpha-2-macroglobulin, a variable of the logistic regression model for early IUGR diagnosis.

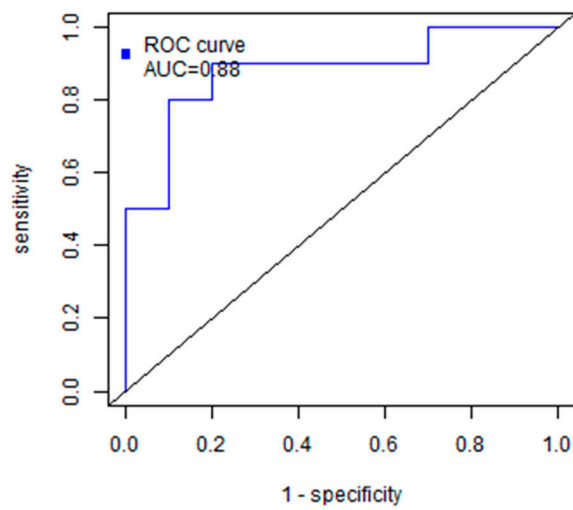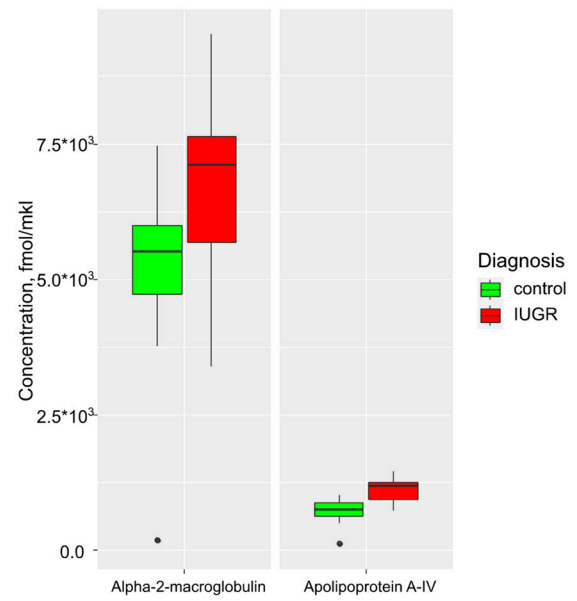

Figure S9. ROC-curve and box-plot of maternal plasma Alpha-2-macroglobulin and Apolipoprotein A-IV, variables of the logistic regression model for late IUGR diagnosis.

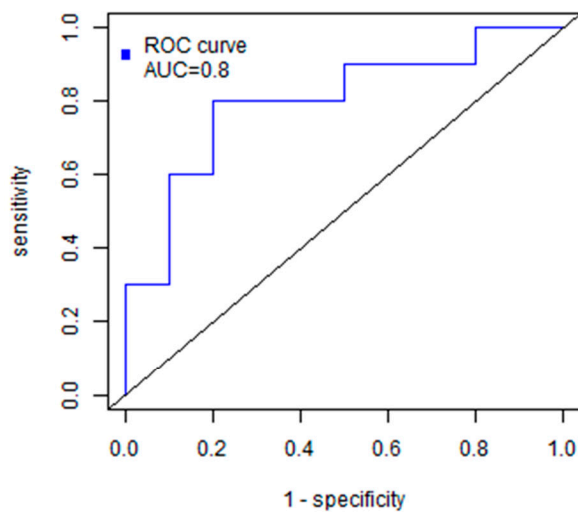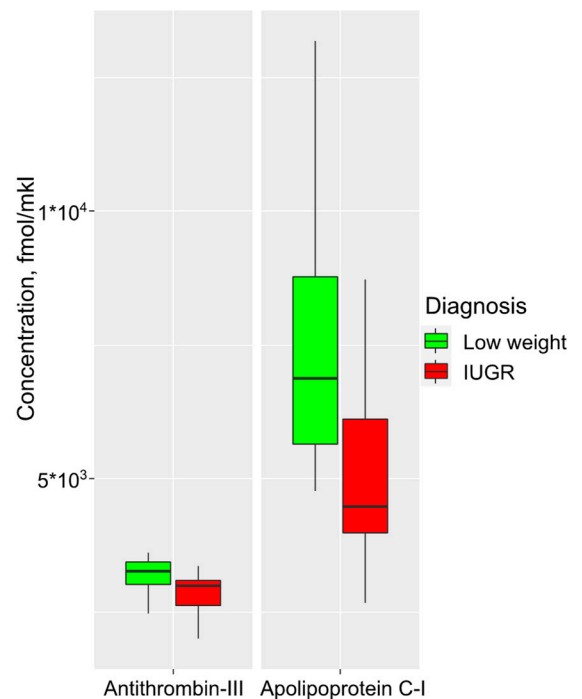

Figure S10. ROC-curve and box-plot of maternal plasma Antithrombin-III and Apolipoprotein C-I, variables of the logistic regression model for differentiation between late IUGR and SGA.



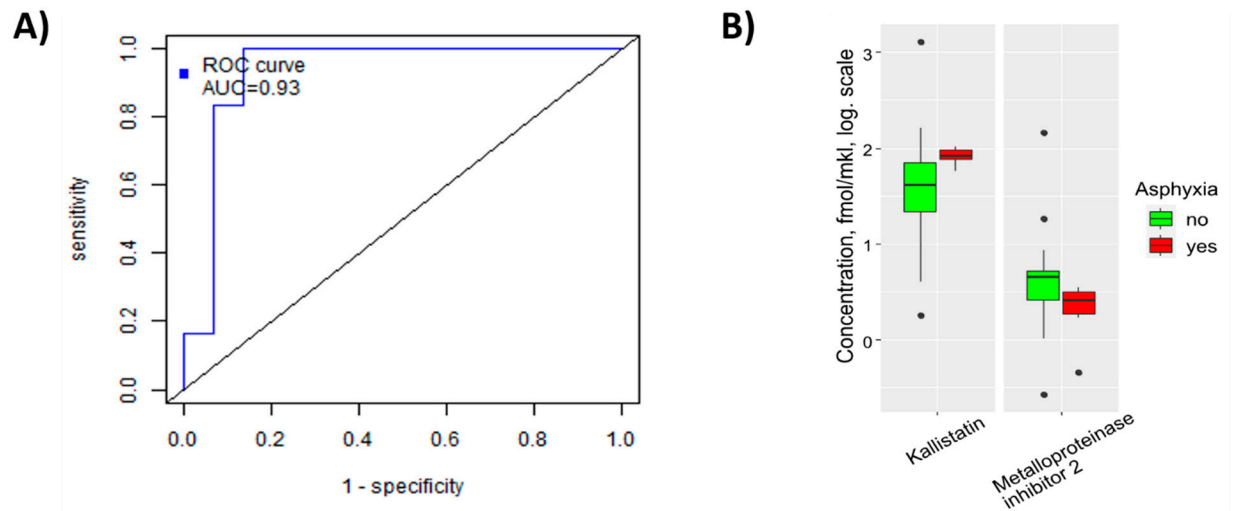

Figure S11. ROC-curve and box-plot of maternal plasma Kallistatin and Metalloproteinase inhibitor 2, variables of the logistic regression model for fetal asphyxia prognosis.

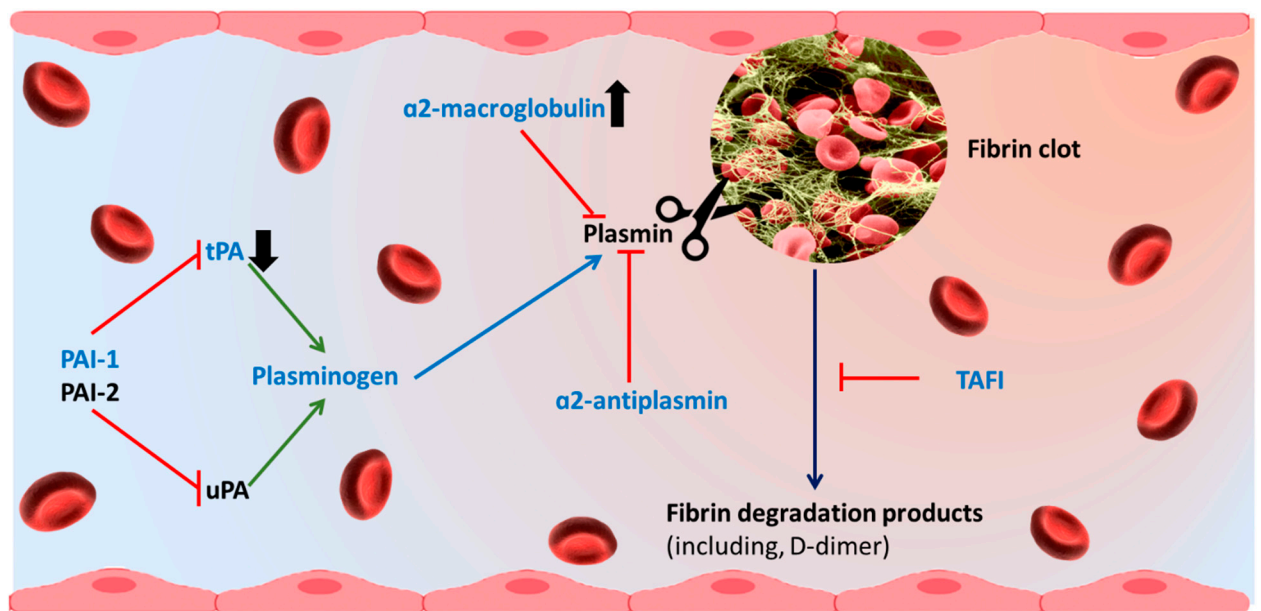

Figure S12. Fibrinolysis system restriction in early IUGR. Blue color – maternal proteins measured by BAK 125 kit. Red and green arrows resemble inhibition, activation, accordingly. Up/down black arrows mark enzymes significantly up/down-regulated with early IUGR compared to appropriate control. tPA (PLAT) - Tissue-type plasminogen activator, PAI-1 - plasminogen activator inhibitor-1, TAFI (Carboxypeptidase B2) - thrombin-activatable fibrinolysis inhibitor.

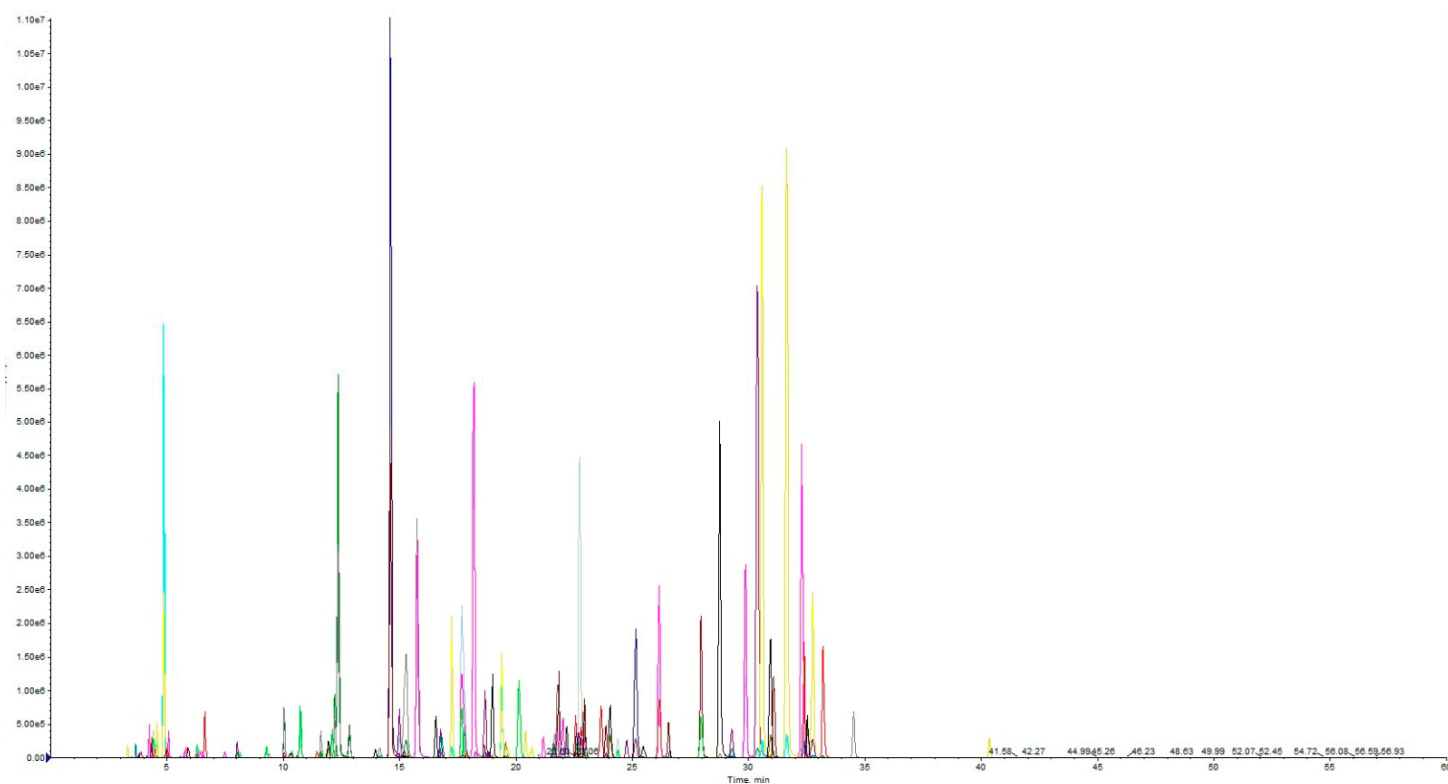

Figure S13. The example of extracted ion chromatogram of MRM transitions monitored for proteotypic NAT and SIS peptides, corresponding to 125 plasma proteins.

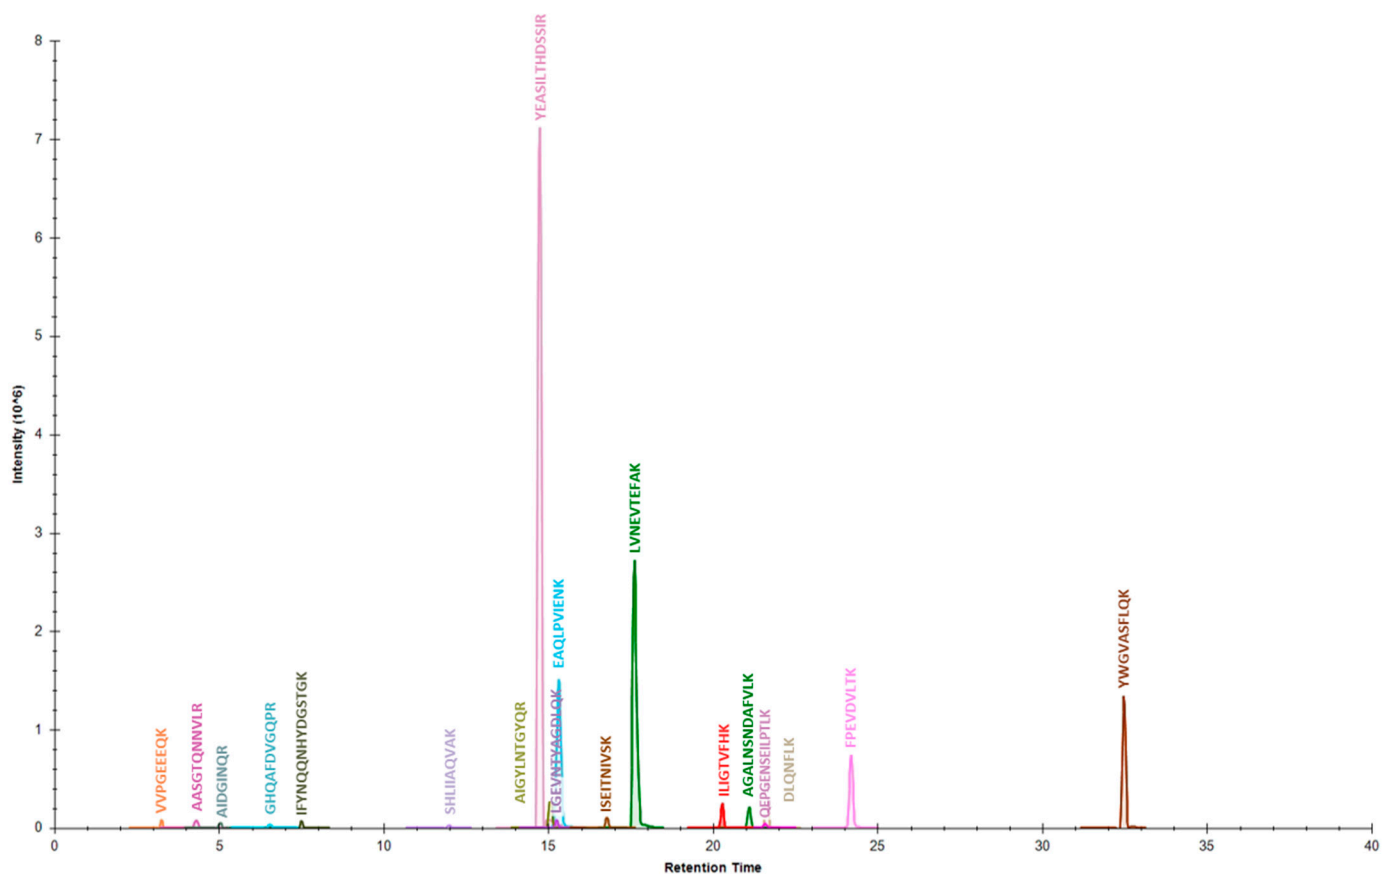

Figure S14. The example of extracted ion chromatogram of MRM transitions monitored for proteotypic NAT and SIS peptides, corresponding to 18 plasma proteins - potential markers for IUGR.

Table S1. Newborns' clinical data.

|                                                                                    | Group 1,<br>Early<br>IUGR<br>(n=10) | Group 2,<br>Late IUGR<br>(n=10) | Group 3,<br>early<br>control (<<br>32 wks)<br>(n=10) | Group 4,<br>Late<br>control (≥<br>32 wks)<br>(n=10) | Group 5,<br>SGA<br>(n=10) | p-value                                                                                                                                            |
|------------------------------------------------------------------------------------|-------------------------------------|---------------------------------|------------------------------------------------------|-----------------------------------------------------|---------------------------|----------------------------------------------------------------------------------------------------------------------------------------------------|
| Birth weight,<br>percentile<br>Me [Q <sub>1</sub> ;Q <sub>3</sub> ]                | 2<br>[1;2]                          | 2<br>[1;3]                      | 56<br>[50;65]                                        | 60<br>[48;86]                                       | 4<br>[4;8]                | <0.05*<br>p <sub>1/3</sub> < 0.001<br>p <sub>1/4</sub> < 0.001<br>p <sub>2/3</sub> < 0.001<br>p <sub>2/4</sub> < 0.001<br>p <sub>4/5</sub> = 0.044 |
| Apgar scores at<br>1st minute<br>Me [Q <sub>1</sub> ;Q <sub>3</sub> ]              | 7<br>[4;7]                          | 7<br>[7;8]                      | 8<br>[6;8]                                           | 8<br>[8;8]                                          | 8<br>[8;8]                | <0.05*<br>p <sub>1/5</sub> = 0.026<br>p <sub>1/4</sub> = 0.026                                                                                     |
| Apgar scores at<br>5th minuteMe<br>[Q <sub>1</sub> ;Q <sub>3</sub> ]               | 8<br>[7;8]                          | 8<br>[8;8]                      | 8<br>[8;9]                                           | 9<br>[8;9]                                          | 9<br>[8;9]                | <0.05*<br>p <sub>1/5</sub> = 0.028                                                                                                                 |
| Umbilical cord<br>blood ph<br>M ± SD(95% CI)                                       | 7 ± 0<br>7 – 7                      | 7 ± 0<br>7 – 7                  | 7 ± 0<br>7 – 7                                       | 7 ± 0<br>7 – 7                                      | 7 ± 0<br>7 – 7            | ≥0.05                                                                                                                                              |
| Umbilical cord<br>blood lactate,<br>mmol/l<br>Me [Q <sub>1</sub> ;Q <sub>3</sub> ] | 4<br>4;7                            | 4<br>3;4                        | 4<br>3;5                                             | 4<br>3;4                                            | 4<br>3;4                  | ≥0.05                                                                                                                                              |
| Umbilical cord<br>blood glucose,<br>mmol/l<br>Me [Q <sub>1</sub> ;Q <sub>3</sub> ] | 3<br>[3;4]                          | 3<br>[3;3]                      | 4<br>[4;5]                                           | 4<br>[4;4]                                          | 4<br>[4;4]                | <0.05*<br>p <sub>2/3</sub> = 0.017<br>p <sub>2/4</sub> = 0.017                                                                                     |
| Intraventricular<br>hemorrhage, n<br>(%)                                           | 4/10<br>(40.0)                      | 4/10<br>(40.0)                  | 3/10<br>(30.0)                                       | 0/10<br>(0.0)                                       | 1/10<br>(10.0)            | <0.05*<br>p <sub>1/4</sub> =0.024*                                                                                                                 |
| Respiratory<br>distress<br>syndrome, n (%)                                         | 4/10<br>(40.0)                      | 0/10<br>(0.0)                   | 2/10<br>(20.0)                                       | 0/10<br>(0.0)                                       | 0 /10<br>(0.0)            | <0.05*<br>p <sub>1/2</sub> =0.016*<br>p <sub>1/4</sub> =0.016*<br>p <sub>1/5</sub> =0.016*                                                         |
| Pulmonary<br>hemorrhage,<br>n (%)                                                  | 4/10<br>(40.0)                      | 0/10<br>(0.0)                   | 0/10<br>(0.0)                                        | 0/10<br>(0.0)                                       | 0/10<br>(0.0)             | 0.002*                                                                                                                                             |
| Disseminated<br>intravascular<br>coagulation, n (%)                                | 5/10<br>(50.0)                      | 2/10<br>(20.0)                  | 2/10<br>(20.0)                                       | 0/10<br>(0.0)                                       | 0/10<br>(0.0)             | <0.05*<br>p <sub>1/4</sub> =0.023*<br>p <sub>1/5</sub> =0.023*                                                                                     |
| Bleeding from the<br>skin, n (%)                                                   | 4/10<br>(40.0)                      | 0/10<br>(0.0)                   | 4/10<br>(40.0)                                       | 0/10<br>(0.0)                                       | 1/10<br>(10.0)            | <0.05*<br>p <sub>1/2</sub> =0.023*<br>p <sub>1/4</sub> =0.023*                                                                                     |
| Extremely low<br>birth weight, n<br>(%)                                            | 6/10<br>(60.0)                      | 0/10<br>(0.0)                   | 1/10<br>(10.0)                                       | 0/10<br>(0.0)                                       | 0/10<br>(0.0)             | <0.05*                                                                                                                                             |

|                                                        |                |               |               |               |               |                                                                                            |
|--------------------------------------------------------|----------------|---------------|---------------|---------------|---------------|--------------------------------------------------------------------------------------------|
| Length of stay<br>Me [Q <sub>1</sub> ;Q <sub>3</sub> ] | 12<br>[6;63]   | 18<br>[15;26] | 9<br>[6;23]   | 4<br>[4;12]   | 6<br>[4;12]   | p <sub>1/2</sub> = 0.034<br>p <sub>1/5</sub> = 0.034<br>p <sub>1/4</sub> = 0.034<br>0.045* |
| Newborn death,<br>n (%)                                | 3/10<br>(30.0) | 0/10<br>(0.0) | 0/10<br>(0.0) | 0/10<br>(0.0) | 0/10<br>(0.0) | 0.012*                                                                                     |

\* statistically significant differences between groups (p<0.05).

Table S2. Molecular pathways, disturbed by IUGR. GO analysis of maternal plasma proteins, differentially expressed in IUGR.

| Processes  |                                                  |                               |                                 |              |                                |                                                                |
|------------|--------------------------------------------------|-------------------------------|---------------------------------|--------------|--------------------------------|----------------------------------------------------------------|
| #term ID   | term description                                 | observ<br>ed<br>gene<br>count | backgro<br>und<br>gene<br>count | streng<br>th | false<br>discov<br>ery<br>rate | matching proteins in your<br>network (labels)                  |
| GO:0097006 | Regulation of plasma lipoprotein particle levels | 5                             | 75                              | 2            | 1.62E-05                       | APOB,ALB,LPA,APOA4,A<br>DIPOQ                                  |
| GO:0034369 | Plasma lipoprotein particle remodeling           | 4                             | 30                              | 2.3          | 3.44E-05                       | APOB,ALB,LPA,APOA4                                             |
| GO:0032642 | Regulation of chemokine production               | 4                             | 84                              | 1.86         | 0.00048                        | LBP,C5,APOD,ADIPOQ                                             |
| GO:0006869 | Lipid transport                                  | 5                             | 296                             | 1.41         | 0.0016                         | LBP,APOB,LPA,APOD,AP<br>OA4                                    |
| GO:0002576 | Platelet degranulation                           | 4                             | 129                             | 1.67         | 0.002                          | A1BG,ALB,A2M,FN1                                               |
| GO:0051179 | Localization                                     | 12                            | 5591                            | 0.51         | 0.0033                         | LBP,C5,APOB,A1BG,ALB,<br>LPA,A2M,APOD,FN1,APO<br>A4,GSN,ADIPOQ |
| GO:0006982 | Response to lipid hydroperoxide                  | 2                             | 3                               | 3            | 0.0044                         | APOA4,GPX3                                                     |
| GO:0006950 | Response to stress                               | 10                            | 3485                            | 0.64         | 0.0054                         | LBP,C5,ALB,A2M,APOD,F<br>N1,APOA4,GSN,GPX3,ADI<br>POQ          |
| GO:0052547 | Regulation of peptidase activity                 | 5                             | 449                             | 1.22         | 0.0066                         | C5,LPA,A2M,FN1,GSN                                             |
| GO:0032722 | Positive regulation of chemokine production      | 3                             | 61                              | 1.87         | 0.008                          | LBP,C5,ADIPOQ                                                  |
| GO:0070887 | Cellular response to chemical stimulus           | 9                             | 2919                            | 0.67         | 0.012                          | LBP,C5,APOB,ALB,FN1,A<br>POA4,GSN,GPX3,ADIPOQ                  |
| GO:0034371 | Chylomicron remodeling                           | 2                             | 9                               | 2.52         | 0.0169                         | APOB,APOA4                                                     |
| GO:1901700 | Response to oxygen-containing compound           | 7                             | 1567                            | 0.83         | 0.017                          | LBP,APOB,APOD,APOA4,<br>GSN,GPX3,ADIPOQ                        |
| GO:0001818 | Negative regulation of cytokine production       | 4                             | 280                             | 1.33         | 0.0181                         | LBP,APOD,FN1,ADIPOQ                                            |
| GO:0034378 | Chylomicron assembly                             | 2                             | 10                              | 2.48         | 0.0181                         | APOB,APOA4                                                     |
| GO:0006810 | Transport                                        | 10                            | 4353                            | 0.54         | 0.0234                         | LBP,APOB,A1BG,ALB,LP<br>A,A2M,APOD,FN1,APOA4,<br>GSN           |

|            |                                                                                  |    |      |      |        |                                                           |
|------------|----------------------------------------------------------------------------------|----|------|------|--------|-----------------------------------------------------------|
| GO:0010642 | Negative regulation of platelet-derived growth factor receptor signaling pathway | 2  | 13   | 2.36 | 0.0234 | APOD,ADIPOQ                                               |
| GO:0042221 | Response to chemical                                                             | 10 | 4333 | 0.54 | 0.0234 | LBP,C5,APOB,ALB,APOD, FN1,APOA4,GSN,GPX3,A DIPOQ          |
| GO:0016192 | Vesicle-mediated transport                                                       | 7  | 1805 | 0.77 | 0.0253 | LBP,APOB,A1BG,ALB,A2 M,FN1,GSN                            |
| GO:0034374 | Low-density lipoprotein particle remodeling                                      | 2  | 15   | 2.3  | 0.0253 | APOB,LPA                                                  |
| GO:0045055 | Regulated exocytosis                                                             | 5  | 697  | 1.03 | 0.0253 | A1BG,ALB,A2M,FN1,GSN                                      |
| GO:0071637 | Regulation of monocyte chemotactic protein-1 production                          | 2  | 16   | 2.27 | 0.0253 | APOD,ADIPOQ                                               |
| GO:0001817 | Regulation of cytokine production                                                | 5  | 742  | 1.01 | 0.029  | LBP,C5,APOD,FN1,ADIPO Q                                   |
| GO:0032102 | Negative regulation of response to external stimulus                             | 4  | 367  | 1.21 | 0.029  | C5,A2M,APOD,ADIPOQ                                        |
| GO:0032879 | Regulation of localization                                                       | 8  | 2740 | 0.64 | 0.029  | LBP,C5,APOB,APOD,FN1, APOA4,GSN,ADIPOQ                    |
| GO:0034375 | High-density lipoprotein particle remodeling                                     | 2  | 18   | 2.22 | 0.029  | ALB,APOA4                                                 |
| GO:0044419 | Interspecies interaction between organisms                                       | 7  | 1899 | 0.74 | 0.029  | LBP,C5,APOB,FN1,APOA4 ,GSN,ADIPOQ                         |
| GO:0051336 | Regulation of hydrolase activity                                                 | 6  | 1284 | 0.85 | 0.029  | C5,LPA,A2M,FN1,APOA4, GSN                                 |
| GO:0051707 | Response to other organism                                                       | 6  | 1256 | 0.86 | 0.029  | LBP,C5,APOB,APOA4,GSN ,ADIPOQ                             |
| GO:0006979 | Response to oxidative stress                                                     | 4  | 393  | 1.19 | 0.0294 | APOD,APOA4,GPX3,ADIP OQ                                   |
| GO:0033344 | Cholesterol efflux                                                               | 2  | 23   | 2.12 | 0.0331 | APOB,APOA4                                                |
| GO:0034383 | Low-density lipoprotein particle clearance                                       | 2  | 24   | 2.1  | 0.0338 | APOB,ADIPOQ                                               |
| GO:0052548 | Regulation of endopeptidase activity                                             | 4  | 418  | 1.16 | 0.0338 | C5,LPA,A2M,GSN                                            |
| GO:1905952 | Regulation of lipid localization                                                 | 3  | 151  | 1.48 | 0.0338 | APOB,APOA4,ADIPOQ                                         |
| GO:0019216 | Regulation of lipid metabolic process                                            | 4  | 424  | 1.15 | 0.034  | APOB,APOD,APOA4,ADIP OQ                                   |
| GO:0030334 | Regulation of cell migration                                                     | 5  | 865  | 0.94 | 0.0396 | LBP,C5,APOD,FN1,ADIPO Q                                   |
| GO:0002683 | Negative regulation of immune system process                                     | 4  | 450  | 1.13 | 0.0404 | C5,A2M,APOD,ADIPOQ                                        |
| GO:0042744 | Hydrogen peroxide catabolic process                                              | 2  | 28   | 2.03 | 0.0404 | APOA4,GPX3                                                |
| GO:0050896 | Response to stimulus                                                             | 12 | 8046 | 0.35 | 0.0427 | LBP,C5,APOB,A1BG,ALB, A2M,APOD,FN1,APOA4,G SN,GPX3,ADIPOQ |

| GO:0010743       | Regulation of macrophage derived foam cell differentiation   | 2                             | 31                              | 1.99         | 0.0471                         | APOB,ADIPOQ                                   |
|------------------|--------------------------------------------------------------|-------------------------------|---------------------------------|--------------|--------------------------------|-----------------------------------------------|
| GO:0002682       | Regulation of immune system process                          | 6                             | 1514                            | 0.78         | 0.0489                         | LBP,C5,A2M,APOD,GSN,A<br>DIPOQ                |
| <b>Diseases</b>  |                                                              |                               |                                 |              |                                |                                               |
| #term ID         | term description                                             | observ<br>ed<br>gene<br>count | backgro<br>und<br>gene<br>count | streng<br>th | false<br>discov<br>ery<br>rate | matching proteins in your<br>network (labels) |
| DOID:9120        | Amyloidosis                                                  | 5                             | 70                              | 2.03         | 3.95E-<br>06                   | ALB,A2M,FN1,APOA4,GS<br>N                     |
| DOID:00601<br>58 | Acquired metabolic disease                                   | 6                             | 320                             | 1.45         | 6.91E-<br>05                   | ALB,A2M,FN1,APOA4,GS<br>N,ADIPOQ              |
| DOID:00146<br>67 | Disease of metabolism                                        | 7                             | 997                             | 1.02         | 0.0017                         | APOB,ALB,A2M,FN1,APO<br>A4,GSN,ADIPOQ         |
| <b>KEGG</b>      |                                                              |                               |                                 |              |                                |                                               |
| #term ID         | term description                                             | observ<br>ed<br>gene<br>count | backgro<br>und<br>gene<br>count | strengt<br>h | false<br>discov<br>ery<br>rate | matching proteins in your<br>network (labels) |
| hsa04979         | Cholesterol metabolism                                       | 3                             | 48                              | 1.97         | 0.0016                         | APOB,LPA,APOA4                                |
| hsa04977         | Vitamin digestion and<br>absorption                          | 2                             | 24                              | 2.1          | 0.022                          | APOB,APOA4                                    |
| hsa04975         | Fat digestion and<br>absorption                              | 2                             | 41                              | 1.87         | 0.0405                         | APOB,APOA4                                    |
| <b>Pathways</b>  |                                                              |                               |                                 |              |                                |                                               |
| #term ID         | term description                                             | observ<br>ed<br>gene<br>count | backgro<br>und<br>gene<br>count | streng<br>th | false<br>discov<br>ery<br>rate | matching proteins in your<br>network (labels) |
| HSA-174824       | Plasma lipoprotein<br>assembly, remodeling, and<br>clearance | 5                             | 71                              | 2.03         | 2.10E-<br>06                   | APOB,ALB,LPA,A2M,APO<br>A4                    |
| HSA-<br>8963899  | Plasma lipoprotein<br>remodeling                             | 4                             | 32                              | 2.27         | 7.39E-<br>06                   | APOB,ALB,LPA,APOA4                            |
| HSA-<br>8963898  | Plasma lipoprotein<br>assembly                               | 3                             | 19                              | 2.38         | 0.0002<br>5                    | APOB,A2M,APOA4                                |
| HSA-114608       | Platelet degranulation                                       | 4                             | 127                             | 1.68         | 0.0007<br>1                    | A1BG,ALB,A2M,FN1                              |
| HSA-382551       | Transport of small<br>molecules                              | 6                             | 721                             | 1.1          | 0.0013                         | APOB,ALB,LPA,A2M,APO<br>D,APOA4               |
| HSA-<br>8964041  | LDL remodeling                                               | 2                             | 4                               | 2.88         | 0.0019                         | APOB,LPA                                      |
| HSA-109582       | Hemostasis                                                   | 5                             | 605                             | 1.09         | 0.0065                         | APOB,A1BG,ALB,A2M,FN<br>1                     |
| HSA-<br>8963888  | Chylomicron assembly                                         | 2                             | 10                              | 2.48         | 0.0065                         | APOB,APOA4                                    |
| HSA-<br>8963901  | Chylomicron remodeling                                       | 2                             | 10                              | 2.48         | 0.0065                         | APOB,APOA4                                    |
| HSA-<br>8957275  | Post-translational protein<br>phosphorylation                | 3                             | 107                             | 1.63         | 0.0086                         | APOB,ALB,FN1                                  |

|             |                                                                                                                             |   |     |      |        |              |
|-------------|-----------------------------------------------------------------------------------------------------------------------------|---|-----|------|--------|--------------|
| HSA-381426  | Regulation of Insulin-like Growth Factor (IGF) transport and uptake by Insulin-like Growth Factor Binding Proteins (IGFBPs) | 3 | 124 | 1.56 | 0.0121 | APOB,ALB,FN1 |
| HSA-5686938 | Regulation of TLR by endogenous ligand                                                                                      | 2 | 19  | 2.2  | 0.0132 | LBP,APOB     |

**Table S3. Transition list and parameters used to acquire all serum samples in this study.** Liquid chromatography - multiple reaction monitoring mass spectrometry (LC-MRM MS) was performed using QTRAP SCIEX6500+ mass spectrometer (SCIEX, Canada). The BAK 125 kit (MRM Proteomics Inc, Montreal, Canada) was used to quantify 125 proteins by measuring the concentration of one surrogate proteotypic peptide for each protein. All 125 peptides are measured within a single LC-MRM MS run. The observed ratio of the peak areas for the light peptide vs. the fixed-concentration SIS peptide were used to calculate the concentration of the endogenous peptide in serum.

| Q1 mass | Q3 mass | RT    | Peptide ID                                                             | DP | CE   |
|---------|---------|-------|------------------------------------------------------------------------|----|------|
| 788.898 | 681.832 | 23.54 | 78 kDa glucose-regulated protein.ITPSYVAFTPEGER.P11021.y12++.heavy     | 20 | 32   |
| 783.89  | 676.83  | 23.54 | 78 kDa glucose-regulated protein.ITPSYVAFTPEGER.P11021.y12++.light     | 20 | 32   |
| 560.3   | 893.424 | 15.3  | Adipocyte plasma membrane-associated protein.LLEYDTVTR.Q9HDC9.y7.heavy | 20 | 23   |
| 555.295 | 883.42  | 15.3  | Adipocyte plasma membrane-associated protein.LLEYDTVTR.Q9HDC9.y7.light | 20 | 23   |
| 591.273 | 756.329 | 8.1   | Adiponectin.IFYNQNHYDGSTGK.+3y13+2.light                               | 60 | 26   |
| 593.939 | 760.34  | 8.28  | Adiponectin.IFYNQNHYDGSTGK.Q15848.y13++.heavy                          | 60 | 23   |
| 567.764 | 833.428 | 19.83 | Afamin.DADPDTFFAK.P43652.y7.heavy                                      | 20 | 27   |
| 563.764 | 825.428 | 19.83 | Afamin.DADPDTFFAK.P43652.y7.light                                      | 20 | 27   |
| 572.962 | 708.877 | 20.7  | Alpha-1-acid glycoprotein 1.NWGLSVYADKPETTK.P02763.y13++.heavy         | 20 | 23   |
| 570.295 | 704.877 | 20.7  | Alpha-1-acid glycoprotein 1.NWGLSVYADKPETTK.P02763.y13++.light         | 20 | 23   |
| 535.305 | 252.18  | 24.03 | Alpha-1-antichymotrypsin.EIGELYLPK.P01011.y2.heavy                     | 20 | 24   |
| 531.305 | 244.18  | 24.03 | Alpha-1-antichymotrypsin.EIGELYLPK.P01011.y2.light                     | 20 | 24   |
| 559.813 | 805.419 | 20.1  | Alpha-1-antitrypsin .LSITGTYDLK.PEP2013073114.2.y7.heavy               | 20 | 35   |
| 555.813 | 797.419 | 20.1  | Alpha-1-antitrypsin .LSITGTYDLK.PEP2013073114.2.y7.light               | 20 | 35   |
| 623.334 | 243.134 | 34.3  | Alpha-1B-glycoprotein.LETPDFQLFK.P04217.b2.heavy                       | 20 | 31   |
| 619.334 | 243.134 | 34.3  | Alpha-1B-glycoprotein.LETPDFQLFK.P04217.b2.light                       | 20 | 31   |
| 660.854 | 542.257 | 7     | Alpha-2-antiplasmin.LGNQEPGGQTALK.+2b5.heavy                           | 60 | 31.2 |



|         |         |       |                                                             |    |      |
|---------|---------|-------|-------------------------------------------------------------|----|------|
| 656.846 | 542.257 | 7     | Alpha-2-antiplasmin.LGNQEPGGQTALK.+2b5.light                | 60 | 31.2 |
| 411.237 | 587.364 | 13.32 | Alpha-2-HS-glycoprotein.FSVVYAK.P02765.y5.heavy             | 20 | 19   |
| 407.229 | 579.349 | 13.32 | Alpha-2-HS-glycoprotein.FSVVYAK.P02765.y5.light             | 20 | 19   |
| 633.33  | 861.445 | 16    | Alpha-2-macroglobulin.AIGYLNTGYQR.P01023.y7.heavy           | 20 | 31   |
| 628.33  | 851.445 | 16    | Alpha-2-macroglobulin.AIGYLNTGYQR.P01023.y7.light           | 20 | 31   |
| 439.879 | 487.745 | 17.72 | Antithrombin-III.DDLYVSDAFHK.P01008.y8++.heavy              | 20 | 19   |
| 437.21  | 483.74  | 17.72 | Antithrombin-III.DDLYVSDAFHK.P01008.y8++.light              | 20 | 19   |
| 408.551 | 576.803 | 5.43  | Apolipoprotein A-I.ATEHLSTLSEK.P02647.y10++.heavy           | 20 | 21   |
| 405.88  | 572.8   | 5.43  | Apolipoprotein A-I.ATEHLSTLSEK.P02647.y10++.light           | 20 | 21   |
| 475.294 | 478.348 | 18    | Apolipoprotein A-II .EQLTPLIK.PEP20130306.2.y4.heavy        | 20 | 23   |
| 471.295 | 470.348 | 18    | Apolipoprotein A-II .EQLTPLIK.PEP20130306.2.y4.light        | 20 | 23   |
| 708.367 | 300.155 | 16.11 | Apolipoprotein A-IV.LGEVNTYAGDLQK.P06727.b3.heavy           | 40 | 35   |
| 704.36  | 300.155 | 16.11 | Apolipoprotein A-IV.LGEVNTYAGDLQK.P06727.b3.light           | 40 | 35   |
| 528.297 | 454.763 | 25.2  | Apolipoprotein B-100.FPEVDVLTK.P04114.y8++.heavy            | 20 | 28   |
| 524.29  | 450.763 | 25.2  | Apolipoprotein B-100.FPEVDVLTK.P04114.y8++.light            | 20 | 28   |
| 605.288 | 894.445 | 23.86 | Apolipoprotein C-I.EWFSETFQK.P02654.y7.heavy                | 20 | 29   |
| 601.28  | 886.43  | 23.86 | Apolipoprotein C-I.EWFSETFQK.P02654.y7.light                | 20 | 29   |
| 522.279 | 265.118 | 13.95 | Apolipoprotein C-II.TYLPVDEK.P02655.b2.heavy                | 40 | 23   |
| 518.27  | 265.118 | 13.95 | Apolipoprotein C-II.TYLPVDEK.P02655.b2.light                | 40 | 23   |
| 602.809 | 244.108 | 27.25 | Apolipoprotein C-III.GWVTDGFSSLK.P02656.b2.heavy            | 40 | 27   |
| 598.809 | 244.108 | 27.25 | Apolipoprotein C-III.GWVTDGFSSLK.P02656.b2.light            | 40 | 27   |
| 541.808 | 497.308 | 18.97 | Apolipoprotein C-IV.ELLETVVNR.P55056.y4.heavy               | 40 | 22   |
| 536.808 | 487.308 | 18.97 | Apolipoprotein C-IV.ELLETVVNR.P55056.y4.light               | 40 | 27   |
| 441.258 | 669.356 | 6.6   | Apolipoprotein D .VLNQELR.PEP2013021305.2.y5.heavy          | 40 | 40   |
| 436.258 | 659.356 | 6.6   | Apolipoprotein D .VLNQELR.PEP2013021305.2.y5.light          | 40 | 40   |
| 489.74  | 404.732 | 11.85 | Apolipoprotein E.LGPLVEQGR.P02649.y7++.heavy                | 20 | 23   |
| 484.78  | 399.732 | 11.85 | Apolipoprotein E.LGPLVEQGR.P02649.y7++.light                | 20 | 23   |
| 477.256 | 783.397 | 4.4   | Apolipoprotein L1.VAQELEEK.O14791.y6.heavy                  | 20 | 22   |
| 473.249 | 775.397 | 4.4   | Apolipoprotein L1.VAQELEEK.O14791.y6.light                  | 20 | 23   |
| 414.255 | 609.396 | 20.89 | Apolipoprotein M.AFLTTPR.O95445.y5.heavy                    | 20 | 19   |
| 409.251 | 599.396 | 20.89 | Apolipoprotein M.AFLTTPR.O95445.y5.light                    | 20 | 19   |
| 658.361 | 720.449 | 21.5  | Apolipoprotein(a)<br>.TPAYYPNAGLIK.PEP2014012820.2.y7.heavy | 20 | 25   |

|         |         |       |                                                                           |    |      |
|---------|---------|-------|---------------------------------------------------------------------------|----|------|
| 654.35  | 712.43  | 21.5  | Apolipoprotein(a)<br>.TPAYYPNAGLIK.PEP2014012820.2.y7.light               | 20 | 25   |
| 448.764 | 710.418 | 6.44  | Attractin.SVNNVVVR.O75882.y6.heavy                                        | 20 | 23   |
| 443.759 | 700.409 | 6.44  | Attractin.SVNNVVVR.O75882.y6.light                                        | 20 | 23   |
| 516.772 | 761.382 | 5.61  | Beta-2-glycoprotein 1.ATVVYQGER.P02749.y6.heavy                           | 40 | 27   |
| 511.772 | 751.382 | 5.61  | Beta-2-glycoprotein 1.ATVVYQGER.P02749.y6.light                           | 40 | 27   |
| 624.36  | 578.38  | 23.63 | Beta-Ala-His<br>dipeptidase.ALEQDLPVNIK.Q96KN2.y5.heavy                   | 40 | 27   |
| 620.36  | 570.38  | 23.63 | Beta-Ala-His dipeptidase.ALEQDLPVNIK.Q96KN2.y5.light                      | 40 | 27   |
| 363.229 | 451.266 | 13.3  | Biotinidase.SHLIAQVAK.P43251.b4.heavy                                     | 20 | 18   |
| 360.557 | 451.266 | 13.3  | Biotinidase.SHLIAQVAK.P43251.b4.light                                     | 20 | 18   |
| 643.833 | 228.134 | 6.97  | Cadherin-13.INENTGSVSVTR.P55290.b2.heavy                                  | 20 | 31   |
| 638.83  | 228.134 | 6.97  | Cadherin-13.INENTGSVSVTR.P55290.b2.light                                  | 20 | 31   |
| 489.81  | 766.46  | 22.94 | Carbonic anhydrase 1.VLDALQAIK.P00915.y7.heavy                            | 40 | 19   |
| 485.81  | 758.46  | 22.94 | Carbonic anhydrase 1.VLDALQAIK.P00915.y7.light                            | 40 | 19   |
| 302.185 | 267.673 | 14.6  | Carboxypeptidase B2.IAWHVIR.+3y4+2.heavy                                  | 20 | 12.3 |
| 298.848 | 262.669 | 14.6  | Carboxypeptidase B2.IAWHVIR.+3y4+2.light                                  | 20 | 12.3 |
| 448.745 | 712.362 | 5.58  | Cathelicidin antimicrobial<br>peptide.AIDGINQR.P49913.y6.heavy            | 40 | 22   |
| 443.745 | 702.362 | 5.58  | Cathelicidin antimicrobial<br>peptide.AIDGINQR.P49913.y6.light            | 40 | 22   |
| 407.871 | 467.26  | 6.6   | Cation-independent mannose-6-phosphate<br>receptor.GHQAFDVGQPR.+3y4.heavy | 20 | 17.4 |
| 404.535 | 457.252 | 6.6   | Cation-independent mannose-6-phosphate<br>receptor.GHQAFDVGQPR.+3y4.light | 20 | 17.4 |
| 381.237 | 549.313 | 4.87  | CD5 antigen-like.LVGGLHR.O43866.y5.heavy                                  | 20 | 23   |
| 376.237 | 539.313 | 4.87  | CD5 antigen-like.LVGGLHR.O43866.y5.light                                  | 20 | 23   |
| 396.88  | 456.743 | 4.85  | Ceruloplasmin.IYHSHIDAPK.P00450.y8++.heavy                                | 40 | 19   |
| 394.21  | 452.74  | 4.85  | Ceruloplasmin.IYHSHIDAPK.P00450.y8++.light                                | 40 | 19   |
| 604.314 | 931.472 | 13.01 | Cholinesterase.YLTLNTESTR.P06276.y8.heavy                                 | 20 | 30   |
| 599.314 | 921.472 | 13.01 | Cholinesterase.YLTLNTESTR.P06276.y8.light                                 | 20 | 30   |
| 649.827 | 385.207 | 15.11 | Clusterin.ELDESLQVAER.P10909.y3.heavy                                     | 40 | 27   |
| 644.823 | 375.207 | 15.11 | Clusterin.ELDESLQVAER.P10909.y3.light                                     | 40 | 27   |
| 536.824 | 702.417 | 29.4  | Coagulation factor IX.SALVLQYLR.P00740.y5.heavy                           | 40 | 27   |
| 531.82  | 692.417 | 29.4  | Coagulation factor IX.SALVLQYLR.P00740.y5.light                           | 40 | 27   |

|         |         |       |                                                                   |    |      |
|---------|---------|-------|-------------------------------------------------------------------|----|------|
| 607.272 | 997.462 | 8     | Coagulation factor V<br>.SEAYNTFSER.PEP2013021902.2.y8.heavy      | 20 | 27   |
| 602.272 | 987.462 | 8     | Coagulation factor V<br>.SEAYNTFSER.PEP2013021902.2.y8.light      | 20 | 27   |
| 378.542 | 442.237 | 5.3   | Coagulation factor VIII.LHPHYSIR.P00451.y7++.heavy                | 40 | 18   |
| 375.21  | 437.23  | 5.3   | Coagulation factor VIII.LHPHYSIR.P00451.y7++.light                | 40 | 18   |
| 452.25  | 533.271 | 13.8  | Coagulation factor X<br>.TGIVSGFGR.PEP2013020903.2.y5.heavy       | 60 | 30   |
| 447.25  | 523.271 | 13.8  | Coagulation factor X<br>.TGIVSGFGR.PEP2013020903.2.y5.light       | 60 | 30   |
| 469.253 | 340.702 | 6.51  | Coagulation factor XII.EQPPSLTR.P00748.y6++.heavy                 | 20 | 22   |
| 464.248 | 335.697 | 6.51  | Coagulation factor XII.EQPPSLTR.P00748.y6++.light                 | 20 | 22   |
| 388.221 | 591.313 | 8.84  | Complement C1q subcomponent subunit<br>B.IAFSATR.P02746.y5.heavy  | 20 | 19   |
| 383.221 | 581.313 | 8.84  | Complement C1q subcomponent subunit<br>B.IAFSATR.P02746.y5.light  | 20 | 19   |
| 547.797 | 819.46  | 20.4  | Complement C1q subcomponent subunit<br>C.FQSVFTVTR.+2y7.heavy     | 40 | 25.6 |
| 542.793 | 809.452 | 20.4  | Complement C1q subcomponent subunit<br>C.FQSVFTVTR.+2y7.light     | 40 | 25.6 |
| 263.841 | 310.205 | 11.8  | Complement C1r<br>subcomponent.GLTLHLK.P00736.y5++.heavy          | 20 | 10.5 |
| 261.175 | 306.205 | 11.8  | Complement C1r<br>subcomponent.GLTLHLK.P00736.y5++.light          | 20 | 10.5 |
| 332.183 | 448.237 | 5.1   | Complement C1r subcomponent-like<br>protein.VVVHPDYR.+3y7+2.heavy | 20 | 13.8 |
| 328.847 | 443.233 | 5.1   | Complement C1r subcomponent-like<br>protein.VVVHPDYR.+3y7+2.light | 20 | 13.8 |
| 644.333 | 216.098 | 23.1  | Complement C1s<br>subcomponent.TNFDNDIALVR.P09871.b2.heavy        | 60 | 32   |
| 639.333 | 216.098 | 23.1  | Complement C1s<br>subcomponent.TNFDNDIALVR.P09871.b2.light        | 60 | 32   |
| 360.87  | 469.26  | 11.5  | Complement C2.HAFILQDTK.P06681.b4.heavy                           | 20 | 23   |
| 358.2   | 469.26  | 11.5  | Complement C2.HAFILQDTK.P06681.b4.light                           | 20 | 23   |
| 505.785 | 739.408 | 10.92 | Complement C3.TGLQEVEVK.P01024.y6.heavy                           | 20 | 27   |
| 501.785 | 731.408 | 10.92 | Complement C3.TGLQEVEVK.P01024.y6.light                           | 20 | 27   |
| 459.762 | 672.381 | 23.2  | Complement C5.VFQFLEK.+2y5.heavy                                  | 20 | 21.3 |
| 455.755 | 664.366 | 23.2  | Complement C5.VFQFLEK.+2y5.light                                  | 20 | 21.3 |

|         |         |       |                                                                            |    |      |
|---------|---------|-------|----------------------------------------------------------------------------|----|------|
| 756.371 | 227.175 | 23.3  | Complement component C7<br>.LIDQYGTHYLQSGSLGGEYR.PEP20120919025.3.b2.heavy | 60 | 26.7 |
| 753.038 | 227.175 | 23.3  | Complement component C7<br>.LIDQYGTHYLQSGSLGGEYR.PEP20120919025.3.b2.light | 60 | 26.7 |
| 625.884 | 525.826 | 32.6  | Complement component<br>C9.LSPIYNLVPVK.P02748.y9++.heavy                   | 20 | 27   |
| 621.884 | 521.826 | 32.6  | Complement component<br>C9.LSPIYNLVPVK.P02748.y9++.light                   | 20 | 27   |
| 582.324 | 679.387 | 18.85 | Complement factor B.EELPAQDIK.P00751.y6.heavy                              | 20 | 23   |
| 578.324 | 671.387 | 18.85 | Complement factor B.EELPAQDIK.P00751.y6.light                              | 20 | 23   |
| 401.522 | 514.748 | 2.6   | Complement factor H.SSQESYAHGTK.+3y9+2.heavy                               | 20 | 17.1 |
| 398.851 | 510.741 | 2.6   | Complement factor H.SSQESYAHGTK.+3y9+2.light                               | 20 | 17.1 |
| 600.829 | 954.514 | 30.2  | Complement factor I.VFSLQWGEVK.P05156.y8.heavy                             | 20 | 23   |
| 596.829 | 946.514 | 30.2  | Complement factor I.VFSLQWGEVK.P05156.y8.light                             | 20 | 23   |
| 886.969 | 252.18  | 34    | Corticosteroid-binding<br>globulin.WSAGLTSSQVDLYIPK.P08185.y2.heavy        | 20 | 39   |
| 882.962 | 244.166 | 34    | Corticosteroid-binding<br>globulin.WSAGLTSSQVDLYIPK.P08185.y2.light        | 20 | 39   |
| 617.813 | 300.155 | 21.5  | Cystatin-C.ALDFAVGEYNK.+2b3.heavy                                          | 20 | 29.1 |
| 613.806 | 300.155 | 21.5  | Cystatin-C.ALDFAVGEYNK.+2b3.light                                          | 20 | 29.1 |
| 521.321 | 827.502 | 33.2  | Endothelial protein C<br>receptor.TLAFPLTIR.Q9UNN8.y7.heavy                | 20 | 23   |
| 516.321 | 817.502 | 33.2  | Endothelial protein C<br>receptor.TLAFPLTIR.Q9UNN8.y7.light                | 20 | 23   |
| 460.807 | 708.453 | 31.4  | Fetuin-B.LVVLPPFK.Q9UGM5.y6.heavy                                          | 20 | 19   |
| 456.807 | 700.453 | 31.4  | Fetuin-B.LVVLPPFK.Q9UGM5.y6.light                                          | 20 | 19   |
| 549.93  | 516.281 | 8.7   | Fibrinogen alpha chain<br>.ESSSHHPGIAEFPSR.PEP9999032685.3.y4.heavy        | 20 | 31   |
| 546.597 | 506.281 | 8.7   | Fibrinogen alpha chain<br>.ESSSHHPGIAEFPSR.PEP9999032685.3.y4.light        | 20 | 31   |
| 713.036 | 764.376 | 25.4  | Fibrinogen beta<br>chain.HQLYIDETVNSNIPTNLR.P02675.b13++.heavy             | 20 | 19   |
| 709.703 | 764.376 | 25.4  | Fibrinogen beta<br>chain.HQLYIDETVNSNIPTNLR.P02675.b13++.light             | 20 | 19   |
| 501.256 | 605.327 | 15.5  | Fibrinogen gamma<br>chain.YEASILTHDSSIR.P02679.y11++.heavy                 | 20 | 23   |
| 497.92  | 600.32  | 15.5  | Fibrinogen gamma<br>chain.YEASILTHDSSIR.P02679.y11++.light                 | 20 | 23   |

|         |         |       |                                                                  |    |    |
|---------|---------|-------|------------------------------------------------------------------|----|----|
| 625.303 | 744.392 | 11.5  | Fibronectin.HTSVQTTSSGSGPFTDVR.P02751.y6.heavy                   | 40 | 23 |
| 621.969 | 734.392 | 11.5  | Fibronectin.HTSVQTTSSGSGPFTDVR.P02751.y6.light                   | 40 | 23 |
| 594.782 | 704.36  | 19.82 | Fibulin-1.TGYFFDGISR.P23142.y6.heavy                             | 20 | 27 |
| 589.782 | 694.36  | 19.82 | Fibulin-1.TGYFFDGISR.P23142.y6.light                             | 20 | 27 |
| 682.4   | 878.544 | 35.2  | Galectin-3-binding protein.SDLAVPSELALLK.Q08380.y8.heavy         | 20 | 28 |
| 678.4   | 870.544 | 35.2  | Galectin-3-binding protein.SDLAVPSELALLK.Q08380.y8.light         | 20 | 28 |
| 664.359 | 200.103 | 22.2  | Gelsolin.AGALNSNDAFVLK.P06396.b3.heavy                           | 40 | 35 |
| 660.359 | 200.103 | 22.2  | Gelsolin.AGALNSNDAFVLK.P06396.b3.light                           | 40 | 35 |
| 781.912 | 653.361 | 22.66 | Glutathione peroxidase 3.QEPGENSEILPTLK.P22352.y12++.heavy       | 20 | 35 |
| 777.912 | 649.361 | 22.66 | Glutathione peroxidase 3.QEPGENSEILPTLK.P22352.y12++.light       | 20 | 35 |
| 649.877 | 500.302 | 31.44 | Haptoglobin.DIAPTLTLVVGK.P00738.y9++.heavy                       | 20 | 24 |
| 645.877 | 496.302 | 31.44 | Haptoglobin.DIAPTLTLVVGK.P00738.y9++.light                       | 20 | 24 |
| 513.92  | 498.29  | 10.1  | Hemoglobin subunit alpha.VGAHAGEYGAEALER.P69905.y4.heavy         | 20 | 24 |
| 510.59  | 488.29  | 10.1  | Hemoglobin subunit alpha.VGAHAGEYGAEALER.P69905.y4.light         | 20 | 24 |
| 615.811 | 485.255 | 26.3  | Hemopexin.NFPSPVDAAFR.P02790.y9++.heavy                          | 40 | 23 |
| 610.811 | 480.255 | 26.3  | Hemopexin.NFPSPVDAAFR.P02790.y9++.light                          | 40 | 23 |
| 519.795 | 824.451 | 13.2  | Heparin cofactor 2.TLEAQLTPR.P05546.y7.heavy                     | 20 | 27 |
| 514.795 | 814.451 | 13.2  | Heparin cofactor 2.TLEAQLTPR.P05546.y7.light                     | 20 | 27 |
| 599.827 | 901.477 | 27.4  | Hepatocyte growth factor-like protein.SPLNDFQVLR.P26927.y7.heavy | 20 | 32 |
| 594.827 | 891.477 | 27.4  | Hepatocyte growth factor-like protein.SPLNDFQVLR.P26927.y7.light | 20 | 32 |
| 497.787 | 796.429 | 12.64 | Hyaluronan-binding protein 2.VVLGDQDLK.Q14520.y7.heavy           | 20 | 22 |
| 493.787 | 788.429 | 12.64 | Hyaluronan-binding protein 2.VVLGDQDLK.Q14520.y7.light           | 20 | 22 |
| 393.231 | 291.186 | 19.4  | Ig mu chain C region.GFPSVLR.P01871.y5++.heavy                   | 20 | 17 |
| 388.227 | 286.181 | 19.4  | Ig mu chain C region.GFPSVLR.P01871.y5++.light                   | 20 | 17 |
| 559.935 | 737.354 | 15.94 | Insulin-like growth factor I.GFYFNKPTGYGSSSR.P05019.y13++.heavy  | 20 | 23 |

|         |          |       |                                                                           |    |    |
|---------|----------|-------|---------------------------------------------------------------------------|----|----|
| 556.602 | 732.354  | 15.94 | Insulin-like growth factor<br>I.GFYFNKPTGYGSSSR.P05019.y13++.light        | 20 | 23 |
| 419.25  | 566.34   | 5.14  | Inter-alpha-trypsin inhibitor heavy chain<br>H2.SLAPTAAAK.P19823.y6.heavy | 20 | 19 |
| 415.25  | 558.34   | 5.14  | Inter-alpha-trypsin inhibitor heavy chain<br>H2.SLAPTAAAK.P19823.y6.light | 20 | 19 |
| 544.844 | 862.513  | 29.5  | Intercellular adhesion molecule<br>1.LLGIETPLPK.P05362.y8.heavy           | 40 | 26 |
| 540.844 | 854.513  | 29.5  | Intercellular adhesion molecule<br>1.LLGIETPLPK.P05362.y8.light           | 40 | 26 |
| 397.219 | 568.318  | 6.83  | Interleukin-10.AHVNSLGENLK.P22301.y5.heavy                                | 20 | 17 |
| 394.55  | 560.3    | 6.83  | Interleukin-10.AHVNSLGENLK.P22301.y5.light                                | 20 | 17 |
| 431.919 | 597.84   | 20.1  | Kallistatin.VGSALFLSHNLK.P29622.y11++.heavy                               | 20 | 21 |
| 429.252 | 593.84   | 20.1  | Kallistatin.VGSALFLSHNLK.P29622.y11++.light                               | 20 | 21 |
| 636.807 | 201.123  | 7.4   | Keratin type I cytoskeletal<br>10.SLLEGEGSSGGGGR.P13645.b2.heavy          | 20 | 35 |
| 631.802 | 201.124  | 7.4   | Keratin type I cytoskeletal<br>10.SLLEGEGSSGGGGR.P13645.b2.light          | 20 | 35 |
| 602.316 | 293.113  | 16.69 | Keratin,type II<br>cytoskeletal.YEELQVTVGR.PEP20121106047.2.b2.heavy      | 20 | 30 |
| 597.312 | 293.114  | 16.69 | Keratin,type II<br>cytoskeletal.YEELQVTVGR.PEP20121106047.2.b2.light      | 20 | 30 |
| 630.306 | 1059.487 | 20    | Kininogen-1 .TVGSDTFYSEK.PEP2015082124.2.y9.heavy                         | 20 | 23 |
| 626.306 | 1051.487 | 20    | Kininogen-1 .TVGSDTFYSEK.PEP2015082124.2.y9.light                         | 20 | 23 |
| 595.345 | 735.402  | 30.36 | Leucine-rich alpha-2-<br>glycoprotein.DLLLPQPDLR.P02750.y6.heavy          | 20 | 24 |
| 590.345 | 725.402  | 30.36 | Leucine-rich alpha-2-<br>glycoprotein.DLLLPQPDLR.P02750.y6.light          | 20 | 24 |
| 629.336 | 930.447  | 33.8  | Lipopolysaccharide-binding<br>protein.ITLPDFTGDLR.P18428.y8.heavy         | 20 | 27 |
| 624.336 | 920.447  | 33.8  | Lipopolysaccharide-binding<br>protein.ITLPDFTGDLR.P18428.y8.light         | 20 | 27 |
| 501.766 | 802.444  | 13.3  | L-selectin.AEIEYLEK.P14151.y6.heavy                                       | 40 | 19 |
| 497.76  | 794.43   | 13.3  | L-selectin.AEIEYLEK.P14151.y6.light                                       | 40 | 19 |
| 399.718 | 541.312  | 19.87 | Lysozyme C.AWVAWR.P61626.y4.heavy                                         | 20 | 19 |
| 394.714 | 531.303  | 19.87 | Lysozyme C.AWVAWR.P61626.y4.light                                         | 20 | 19 |
| 820.924 | 258.145  | 26.58 | Mannan-binding lectin serine protease<br>1.TGVITSPDFPNYPK.P48740.b3.heavy | 60 | 40 |

|         |          |       |                                                                                   |    |      |
|---------|----------|-------|-----------------------------------------------------------------------------------|----|------|
| 816.917 | 258.145  | 26.58 | Mannan-binding lectin serine protease<br>1.TGVITSPDFPNYPK.P48740.b3.light         | 60 | 40   |
| 499.261 | 585.338  | 24.8  | Mannan-binding lectin serine protease<br>2.WPEPVFGR.O00187.y5.heavy               | 20 | 27   |
| 494.256 | 575.329  | 24.8  | Mannan-binding lectin serine protease<br>2.WPEPVFGR.O00187.y5.light               | 20 | 27   |
| 401.233 | 283.186  | 10.3  | Metalloproteinase inhibitor 2.EYLIAGK.+2y3.heavy                                  | 20 | 18.5 |
| 397.226 | 275.171  | 10.3  | Metalloproteinase inhibitor 2.EYLIAGK.+2y3.light                                  | 20 | 18.5 |
| 434.263 | 544.814  | 17.5  | Myeloblastin.LVNVVLGAHNVR.P24158.y10++.heavy                                      | 20 | 15   |
| 430.93  | 539.814  | 17.5  | Myeloblastin.LVNVVLGAHNVR.P24158.y10++.light                                      | 20 | 15   |
| 435,248 | 586,297  | 22,97 | Vitamin K-dependent protein<br>Z.GLLSGWAR.P22891.y5.heavy                         | 20 | 19   |
| 430,243 | 576,29   | 22,97 | Vitamin K-dependent protein<br>Z.GLLSGWAR.P22891.y5.light                         | 20 | 19   |
| 435.76  | 700.41   | 26.13 | Peroxiredoxin-2.GLFIDGK.P32119.y6.heavy                                           | 20 | 14   |
| 431.76  | 692.41   | 26.13 | Peroxiredoxin-2.GLFIDGK.P32119.y6.light                                           | 20 | 14   |
| 495.287 | 498.327  | 20.74 | Phosphatidylinositol-glycan-specific phospholipase<br>D.FGSSLITVR.P80108.y4.heavy | 40 | 23   |
| 490.282 | 488.319  | 20.74 | Phosphatidylinositol-glycan-specific phospholipase<br>D.FGSSLITVR.P80108.y4.light | 40 | 23   |
| 669.333 | 519.758  | 8.87  | Phospholipid transfer<br>protein.AVEPQLQEEER.P55058.y8++.heavy                    | 40 | 32   |
| 664.333 | 514.758  | 8.87  | Phospholipid transfer<br>protein.AVEPQLQEEER.P55058.y8++.light                    | 40 | 35   |
| 696.351 | 1150.551 | 27.5  | Pigment epithelium-derived<br>factor.LQSLFDSPDFSK.P36955.y10.heavy                | 40 | 32   |
| 692.351 | 1142.551 | 27.5  | Pigment epithelium-derived<br>factor.LQSLFDSPDFSK.P36955.y10.light                | 40 | 32   |
| 598.358 | 920.581  | 32    | Plasma protease C1<br>inhibitor.FQPTLLTLPR.P05155.y8.heavy                        | 40 | 22   |
| 593.358 | 910.581  | 32    | Plasma protease C1<br>inhibitor.FQPTLLTLPR.P05155.y8.light                        | 40 | 22   |
| 586.296 | 501.243  | 35.1  | Plasma serine protease<br>inhibi.AVVEVDESGTR.PEP9999032429.2.y9++.heavy           | 20 | 23   |
| 581.296 | 496.243  | 35.1  | Plasma serine protease<br>inhibi.AVVEVDESGTR.PEP9999032429.2.y9++.light           | 20 | 23   |
| 443.258 | 261.16   | 17.5  | Plasminogen .LFLEPTR.PEP2014090309.2.b2.heavy                                     | 20 | 27   |
| 438.254 | 261.16   | 17.5  | Plasminogen .LFLEPTR.PEP2014090309.2.b2.light                                     | 20 | 27   |

|         |         |       |                                                                       |    |      |
|---------|---------|-------|-----------------------------------------------------------------------|----|------|
| 557.311 | 512.292 | 7.2   | Plasminogen activator<br>inhibit.VFQQVAQASK.PEP2014012801.2.y5.heavy  | 20 | 23   |
| 553.3   | 504.28  | 7.2   | Plasminogen activator<br>inhibit.VFQQVAQASK.PEP2014012801.2.y5.light  | 20 | 23   |
| 556.326 | 669.402 | 17.8  | Pregnancy zone protein.ISEITNIVSK.+2y6.heavy                          | 20 | 26.1 |
| 552.319 | 661.388 | 17.8  | Pregnancy zone protein.ISEITNIVSK.+2y6.light                          | 20 | 26.1 |
| 485.271 | 815.416 | 11.47 | Protein AMBP.HHGPTITAK.+2b8.heavy                                     | 40 | 22.6 |
| 481.264 | 815.416 | 11.47 | Protein AMBP.HHGPTITAK.+2b8.light                                     | 40 | 22.6 |
| 443.25  | 657.38  | 22.81 | Protein S100-A9.DLQNFLK.P06702.y5.heavy                               | 20 | 19   |
| 439.25  | 649.38  | 22.81 | Protein S100-A9.DLQNFLK.P06702.y5.light                               | 20 | 14   |
| 640.83  | 702.418 | 32    | Protein Z-dependent protease<br>inhibitor.ETSNFGFSLLR.Q9UK55.y6.heavy | 20 | 27   |
| 635.83  | 692.418 | 32    | Protein Z-dependent protease<br>inhibitor.ETSNFGFSLLR.Q9UK55.y6.light | 20 | 27   |
| 602.808 | 720.355 | 23.64 | Prothrombin.ELLESYIDGR.P00734.y6.heavy                                | 60 | 26   |
| 597.808 | 710.355 | 23.64 | Prothrombin.ELLESYIDGR.P00734.y6.light                                | 60 | 26   |
| 603.824 | 857.497 | 33.3  | Retinol-binding protein<br>4.YWGVASFLQK.P02753.y8.heavy               | 20 | 28   |
| 599.824 | 849.497 | 33.3  | Retinol-binding protein 4.YWGVASFLQK.P02753.y8.light                  | 20 | 28   |
| 493.756 | 743.418 | 13.53 | Serotransferrin.DGAGDVAFVK.P02787.y7.heavy                            | 60 | 23   |
| 489.756 | 735.418 | 13.53 | Serotransferrin.DGAGDVAFVK.P02787.y7.light                            | 60 | 23   |
| 579.319 | 226.164 | 18.74 | Serum albumin.LVNEVTEFAK.P02768.y2.heavy                              | 40 | 47   |
| 575.319 | 218.164 | 18.74 | Serum albumin.LVNEVTEFAK.P02768.y2.light                              | 40 | 47   |
| 947.466 | 878.497 | 32.5  | Serum paraoxonase_arylesterase<br>1.IFFYDSENPPASEVLR.+2y8.heavy       | 20 | 40   |
| 942.462 | 868.489 | 32.5  | Serum paraoxonase_arylesterase<br>1.IFFYDSENPPASEVLR.+2y8.light       | 20 | 40   |
| 345.886 | 405.242 | 20.13 | Serum paraoxonase_lactonase<br>3.ILIGTVFHK.+3y7+2.heavy               | 40 | 14.5 |
| 343.215 | 401.235 | 20.13 | Serum paraoxonase_lactonase<br>3.ILIGTVFHK.+3y7+2.light               | 40 | 14.5 |
| 477.261 | 594.325 | 18.8  | SPARC.LEAGDHPVELLAR.P09486.y11++.heavy                                | 20 | 21   |
| 473.928 | 589.325 | 18.8  | SPARC.LEAGDHPVELLAR.P09486.y11++.light                                | 20 | 21   |
| 531.261 | 813.398 | 11.58 | Tenascin.FTTDLDSR.P24821.y7.heavy                                     | 20 | 22   |
| 526.261 | 803.398 | 11.58 | Tenascin.FTTDLDSR.P24821.y7.light                                     | 20 | 22   |
| 728.408 | 227.176 | 27.76 | Tenascin-X.ILISGLEPSTPYR.P22105.b2.heavy                              | 20 | 36   |



|         |         |       |                                                                         |    |      |
|---------|---------|-------|-------------------------------------------------------------------------|----|------|
| 723.408 | 227.176 | 27.76 | Tenascin-X.IILISGLEPSTPYR.P22105.b2.light                               | 20 | 36   |
| 441.768 | 498.292 | 19.07 | Thrombospondin-1.GTLLALER.P07996.y4.heavy                               | 20 | 25   |
| 436.768 | 488.292 | 19.07 | Thrombospondin-1.GTLLALER.P07996.y4.light                               | 20 | 25   |
| 418.899 | 526.296 | 22.6  | Thrombospondin-4.KPQDFLEELK.P35443.y4.heavy                             | 20 | 20   |
| 416.233 | 518.296 | 22.6  | Thrombospondin-4.KPQDFLEELK.P35443.y4.light                             | 20 | 20   |
| 292.179 | 352.713 | 6.6   | Thyroxine-binding globulin.AVLHIGEK.+3y6+2.heavy                        | 20 | 11.9 |
| 289.508 | 348.706 | 6.6   | Thyroxine-binding globulin.AVLHIGEK.+3y6+2.light                        | 20 | 11.9 |
| 549.79  | 788.439 | 19.27 | Tissue factor pathway inhibitor (isoform 1).FYYNSVIGK.P10646-1.y7.heavy | 40 | 24   |
| 545.79  | 780.439 | 19.27 | Tissue factor pathway inhibitor (isoform 1).FYYNSVIGK.P10646-1.y7.light | 40 | 24   |
| 511.766 | 824.388 | 3.5   | Tissue-type plasminogen activator.VVPGEEEQK.P00750.y7.heavy             | 20 | 19   |
| 507.766 | 816.388 | 3.5   | Tissue-type plasminogen activator.VVPGEEEQK.P00750.y7.light             | 20 | 19   |
| 561.623 | 739.885 | 21.13 | Transferrin receptor protein 1.GFVEPDHYVVGAQR.P02786.y13++.heavy        | 40 | 23   |
| 558.29  | 734.88  | 21.13 | Transferrin receptor protein 1.GFVEPDHYVVGAQR.P02786.y13++.light        | 40 | 23   |
| 459.59  | 616.86  | 25    | Transthyretin.GSPAINVAVHVFR.P02766.y11++.heavy                          | 20 | 18   |
| 456.26  | 611.86  | 25    | Transthyretin.GSPAINVAVHVFR.P02766.y11++.light                          | 20 | 18   |
| 584.327 | 853.487 | 10.9  | Vascular cell adhesion protein 1.NTVISVNPSTK.P19320.y8.heavy            | 20 | 27   |
| 580.32  | 845.47  | 10.9  | Vascular cell adhesion protein 1.NTVISVNPSTK.P19320.y8.light            | 20 | 27   |
| 489.244 | 641.313 | 7.2   | Vasorin .ESHVTLASPEETR.PEP20121106020.3.y5.heavy                        | 20 | 25   |
| 485.907 | 631.304 | 7.2   | Vasorin .ESHVTLASPEETR.PEP20121106020.3.y5.light                        | 20 | 25   |
| 604.819 | 846.471 | 23.1  | Vitamin K-dependent protein S.SFQTGLFTAAR.PEP20130215010.2.y8.heavy     | 40 | 22   |
| 599.819 | 836.471 | 23.1  | Vitamin K-dependent protein S.SFQTGLFTAAR.PEP20130215010.2.y8.light     | 40 | 22   |
| 716.83  | 657.335 | 22.71 | Vitronectin.FEDGVLPDYPR.P04004.y5.heavy                                 | 20 | 38   |
| 711.841 | 647.335 | 22.71 | Vitronectin.FEDGVLPDYPR.P04004.y5.light                                 | 20 | 38   |
| 895.983 | 1095.59 | 42    | Zinc-alpha-2-glycoprotein.EIPAWVPFDPAAQITK.P25311.y10.heavy             | 20 | 40   |
| 891.983 | 1087.59 | 42    | Zinc-alpha-2-glycoprotein.EIPAWVPFDPAAQITK.P25311.y10.light             | 20 | 40   |
